# Supplementary material for: Synthesis and anti-phytopathogenic activity of 8-hydroxyquinoline derivatives
Source: PubMed Central journal article supplement — RSC Adv. 2019 Sep 24;9(52):30087–99. doi: 10.1039/c9ra05712a (PMC9072087; doi:10.1039/c9ra05712a), 2019-09-24
Supplement: RA-009-C9RA05712A-s001.pdf [file RA-009-C9RA05712A-s001.pdf]

## SUPPORTING INFORMATION

### Synthesis and Anti-phytopathogenic activity of 8- hydroxyquinoline Derivatives

Xiao-Dan Yin<sup>a</sup>, Yu Sun<sup>a</sup>, Raymond Kobla Lawoe<sup>a</sup>, Guan-Zhou Yang<sup>a</sup>, Ying-Qian Liu<sup>\*a</sup>, Xiao-Fei Shang<sup>a,b</sup>, Hua Liu<sup>a</sup>, Yu-Dong Yang<sup>a</sup>, Jia-Kai Zhu<sup>a</sup>, Xiao-Ling Huang<sup>a</sup>

<sup>a</sup> School of Pharmacy, Lanzhou University, Lanzhou 730000, People's Republic of China

<sup>b</sup> Lanzhou Institute of Husbandry and Pharmaceutical Sciences, Chinese Academy of Agricultural Sciences, 335 Jianguoyan, Lanzhou 730050, P.R. China

\*To whom correspondence should be addressed.

Tel.: +86-931-8915686. Fax: +86-931-8915685.

E-mail: yqliu@lzu.edu.cn (Y.Q. Liu).

#### Table of Contents

|                      |   |
|----------------------|---|
| <i>Table 1</i> ..... | 2 |
| <i>Table 2</i> ..... | 3 |

**Table 1.** Comparison of antifungal activity of identical groups modification at compound **2** 2-position and 7-position.

| Compd. <sup>a</sup>     | Conc <sup>b</sup><br>( $\mu\text{g/mL}$ ) | Average inhibition rate $\pm$ SD (%) (n=3) |                          |                           |                          |                           |
|-------------------------|-------------------------------------------|--------------------------------------------|--------------------------|---------------------------|--------------------------|---------------------------|
|                         |                                           | <i>B. C.</i> <sup>c</sup>                  | <i>S.S.</i> <sup>c</sup> | <i>F. G.</i> <sup>c</sup> | <i>F.O.</i> <sup>c</sup> | <i>M. O.</i> <sup>c</sup> |
| <b>S-1</b> <sup>d</sup> | 50                                        | 12.50 $\pm$ 0.31                           | 0.00 $\pm$ 0.00          | 14.17 $\pm$ 0.26          | 17.18 $\pm$ 0.28         | 7.09 $\pm$ 0.42           |
|                         | 25                                        | 0.00 $\pm$ 0.00                            | 0.00 $\pm$ 0.00          | 0.00 $\pm$ 0.00           | 0.00 $\pm$ 0.00          | 0.00 $\pm$ 0.00           |
| <b>S-2</b> <sup>d</sup> | 50                                        | 10.42 $\pm$ 0.19                           | 0.00 $\pm$ 0.00          | 19.79 $\pm$ 0.58          | 16.30 $\pm$ 0.72         | 0.00 $\pm$ 0.00           |
|                         | 25                                        | 0.00 $\pm$ 0.00                            | 0.00 $\pm$ 0.00          | 0.00 $\pm$ 0.00           | 9.62 $\pm$ 0.38          | 0.00 $\pm$ 0.00           |
| <b>4a</b> <sup>e</sup>  | 50                                        | 97.92 $\pm$ 0.72                           | 100.00 $\pm$ 0.00        | 0.00 $\pm$ 0.00           | 36.00 $\pm$ 0.74         | 31.56 $\pm$ 0.72          |
|                         | 25                                        | 85.39 $\pm$ 0.65                           | 100.00 $\pm$ 0.00        | 0.00 $\pm$ 0.00           | 24.89 $\pm$ 0.72         | 11.11 $\pm$ 0.72          |
| <b>4b</b> <sup>e</sup>  | 50                                        | 100.00 $\pm$ 0.00                          | 100.00 $\pm$ 0.00        | 85.00 $\pm$ 0.01          | 93.78 $\pm$ 0.72         | 100.00 $\pm$ 0.00         |
|                         | 25                                        | 98.33 $\pm$ 0.72                           | 86.04 $\pm$ 0.97         | 78.75 $\pm$ 0.01          | 79.56 $\pm$ 0.72         | 74.44 $\pm$ 0.95          |

<sup>a</sup>Compd.: Compound. <sup>b</sup>Conc: Concentration. <sup>c</sup>*B. C.*: *Botrytis cinerea*. *S.S.*: *Sclerotinia sclerotiorum*. *F. G.*: *Fusarium graminearum*. *F.O.*: *Fusarium oxysporum*. f. sp. *vasinfectum*. *M. O.*: *Magnaporthe oryzae*. <sup>d</sup>**S-1**: 2-((4-methylpiperazin-1-yl) methyl)-5-nitroquinolin-8-ol. **S-2**: 2-((4-ethylpiperazin-1-yl) methyl)-5-nitroquinolin-8-ol. <sup>e</sup>**4a**: 7-((4-methylpiperazin-1-yl) methyl)-5-nitroquinolin-8-ol. **4b**: 7-((4-ethyl piperazin-1-yl) methyl)-5-nitroquinolin-8-ol

**Table 2.** 95% confidence interval of EC<sub>50</sub> of series 8-hydroxyquinoline derivatives against five phytopathogenic fungi.

| Compd. <sup>a</sup> | CI (95%)                  |                          |                           |                          |                           |
|---------------------|---------------------------|--------------------------|---------------------------|--------------------------|---------------------------|
|                     | <i>B. C.</i> <sup>b</sup> | <i>S.S.</i> <sup>b</sup> | <i>F. G.</i> <sup>b</sup> | <i>F.O.</i> <sup>b</sup> | <i>M. O.</i> <sup>b</sup> |
| <b>HQ</b>           | 0.0291~0.0376             | 0.0138~0.0240            | 0.0809~0.1070             | 0.1057~0.3203            | 0.0639~0.1455             |
| <b>2</b>            | 0.0015~0.0029             | 0.0011~0.0023            | 0.0103~0.0149             | 0.0053~0.0080            | 0.0111~0.0235             |
| <b>4a</b>           | 0.0588~0.1162             | 0.0389~0.0462            | -                         | -                        | -                         |
| <b>4b</b>           | 0.0122~0.0223             | 0.0298~0.0423            | -                         | -                        | -                         |
| <b>4c</b>           | 0.0492~0.0586             | 0.0447~0.0538            | -                         | -                        | -                         |
| <b>4d</b>           | 0.0494~0.0581             | 0.0490~0.0825            | -                         | -                        | -                         |
| <b>4f</b>           | 0.0268~0.0375             | 0.0430~0.0510            | -                         | -                        | -                         |
| <b>4g</b>           | 0.0403~0.0490             | 0.0402~0.0489            | -                         | -                        | -                         |
| <b>4h</b>           | 0.0267~0.0355             | 0.0385~0.0488            | -                         | -                        | -                         |
| <b>4i</b>           | 0.0453~0.0544             | 0.0433~0.0540            | -                         | -                        | -                         |
| <b>4j</b>           | 0.0320~0.0398             | 0.0180~0.0258            | -                         | -                        | -                         |
| <b>4k</b>           | 0.0238~0.0322             | 0.0385~0.0485            | -                         | -                        | -                         |
| <b>4l</b>           | 0.0184~0.0269             | 0.0197~0.0278            | -                         | -                        | -                         |
| <b>4m</b>           | 0.0623~0.1001             | 0.0231~0.1527            | -                         | -                        | -                         |
| <b>4n</b>           | 0.0245~0.0332             | 0.0176~0.0254            | -                         | -                        | -                         |
| <b>4o</b>           | 0.0292~0.0372             | 0.0320~0.0406            | -                         | -                        | -                         |
| <b>5b</b>           | 0.0351~0.0424             | 0.0305~0.0428            | 0.0135~0.0267             | 0.0203~0.0252            | 0.0131~0.0186             |
| <b>5c</b>           | 0.0097~0.0158             | 0.0020~0.0044            | 0.0099~0.0200             | 0.0127~0.0167            | 0.0120~0.0162             |
| <b>5d</b>           | 0.0126~0.0179             | 0.0165~0.0254            | 0.0126~0.0220             | 0.0188~0.0231            | 0.0131~0.0170             |

|                        |               |               |               |               |               |
|------------------------|---------------|---------------|---------------|---------------|---------------|
| <b>5e</b>              | 0.0316~0.0386 | 0.0314~0.0376 | -             | -             | -             |
| <b>5f</b>              | 0.0300~0.0358 | 0.0294~0.0348 | 0.0155~0.0236 | 0.0308~0.0393 | 0.0247~0.0396 |
| <b>5g</b>              | 0.0147~0.0202 | 0.0166~0.0251 | 0.0177~0.0292 | 0.0321~0.0414 | 0.0135~0.0177 |
| <b>5h</b>              | 0.0403~0.0965 | 0.0344~0.0624 | 0.0156~0.0240 | 0.0209~0.0260 | 0.0124~0.0159 |
| <b>5i</b>              | 0.0200~0.0484 | 0.0162~0.0209 | 0.0158~0.0212 | 0.0186~0.0228 | 0.0137~0.0177 |
| <b>5j</b>              | 0.0309~0.0418 | 0.0196~0.1076 | 0.0190~0.0305 | 0.0178~0.0224 | 0.0135~0.0186 |
| <b>5k</b>              | 0.0315~0.0383 | 0.0279~0.0336 | -             | -             | -             |
| <b>5l</b>              | 0.0181~0.0300 | 0.0122~0.0172 | 0.0169~0.0265 | 0.0209~0.0261 | 0.0104~0.0174 |
| <b>5m</b>              | 0.0174~0.0310 | 0.0359~0.0483 | -             | -             | -             |
| <b>5n</b>              | 0.0076~0.0174 | 0.0164~0.0220 | -             | -             | -             |
| <b>5o</b>              | 0.0254~0.0416 | 0.0386~0.0455 | -             | -             | -             |
| <b>5p</b>              | 0.0167~0.0219 | 0.0299~0.0361 | -             | -             | -             |
| <b>5q</b>              | 0.0212~0.0273 | 0.0288~0.0364 | -             | -             | -             |
| <b>ASB<sup>c</sup></b> | 0.1289~0.9781 | 0.0814~0.3259 | 0.0096~0.0544 | 0.0426~0.3758 | -             |

<sup>a</sup>Compd.: Compound. <sup>b</sup>B. C.: *Botrytis cinerea*. S.S.: *Sclerotinia sclerotiorum*. F. G.: *Fusarium graminearum*. F.O.: *Fusarium oxysporum*. f. sp. *vasinfectum*. M. O.: *Magnaporthe oryzae*.

<sup>c</sup>ASB : Azoxystrobin
